# Supplementary material for: MicroRNA-31 Reduces the Motility of Proinflammatory T Helper 1 Lymphocytes
Source: PubMed Central journal article supplement (PMC6291424; doi:10.3389/fimmu.2018.02813), 2018-12-06
Supplement: Image_1.pdf [file Image_1.pdf]

# Supplementary Figures

1

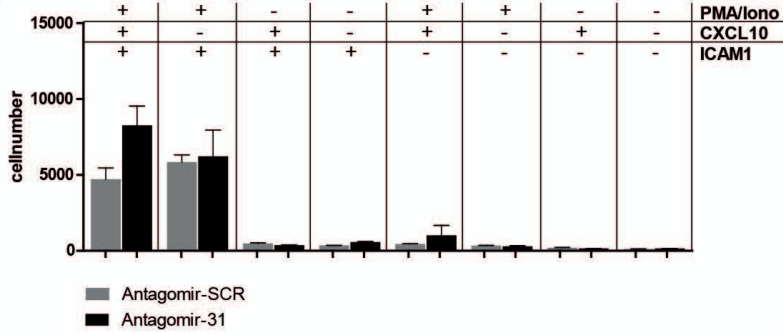

2A

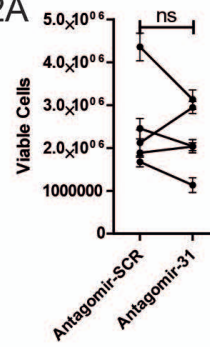

2B

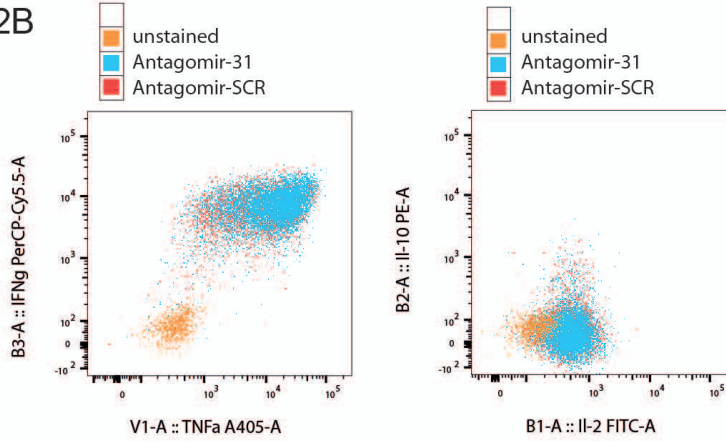

3

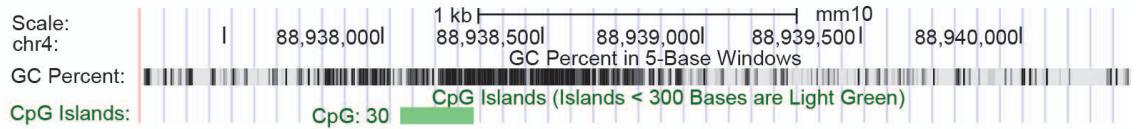

4

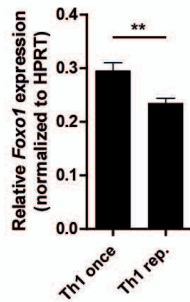

5

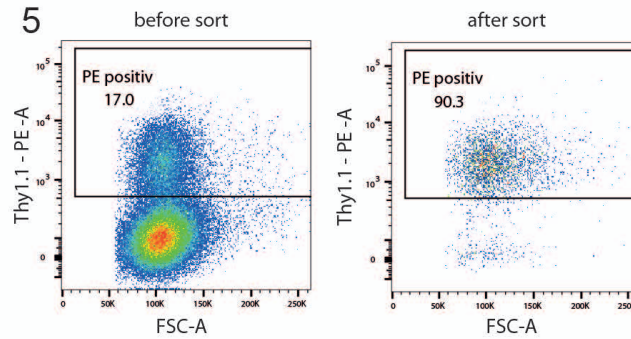

6A

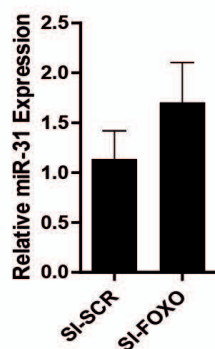

6B

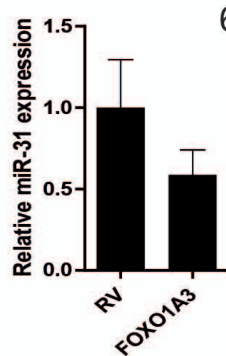

6C

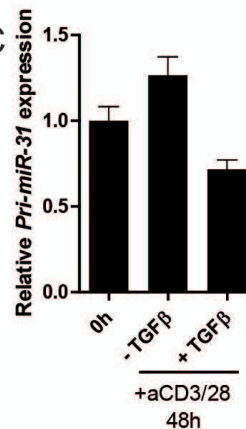

## Supplemental Figure legends

**Supplementary Figure 1: MiR-31 inhibition increases the adhesion of Th1 rep cells.** Th1 rep cells 72h after antagomir treatment and reactivation with  $\alpha$ CD3/28 were seeded in an ICAM1 or IgG1 FC (10  $\mu$ g/ml) coated well for adhesion. Prior to the seeding cells were incubated with PMA/ionomycin and CXCL10. After 45 min, non-adherent cells were removed by an ELX washer and the number of adherent cells was determined using a MACSQuant flow cytometer. Data is shown as mean +SEM, n = 3 from one experiment.

**Supplementary Figure 2: MiR-31 inhibition has no significant impact on cell viability and cytokine production in Th1 rep cells.** (A) Number of viable Th1 rep cells 72h after reactivation with  $\alpha$ CD3/28 and antagomir treatment assessed by flow cytometry. Each data point represents the mean  $\pm$ SEM of independent experiments with n = 3-6 each (Wilcoxon-Test for paired data, p = 0.6). (B) Representative intracellular staining for TNF- $\alpha$ , IFN- $\gamma$ , IL2 and IL10 of Th1 rep cells restimulated with PMA/ionomycin after antagomir treatment.

**Supplementary Figure 3: A CpG island can be found in the putative promoter region.** Excerpt from the putative promoter region analysis obtained from UCSC Genome Browser showing a CpG island in close proximity to the putative TSS.

**Supplementary Figure 4: Reduced *Foxo1* expression in Th1 rep cells.** *Foxo1* expression normalized to *Hprt* in Th1 once and Th1 rep cells (assessed by qRT-PCR). Data is shown as mean +SEM, n = 6 pooled from 2 independent experiments (Mann-Whitney test for unpaired data, \*\*p  $\leq$  0.01).

**Supplementary Figure 5: Purity of Th1 cells overexpressing FOXO1A3.** Representative surface staining of Th1 cells ectopically overexpressing FOXO1A3 with the reporter Thy1.1 determined by flow cytometry.

**Supplementary Figure 6: Mature and *pri-miR-31* expression showed similar regulation.** (A) Mature miR-31 expression normalized to snU6 in repeatedly (two rounds of stimulation) activated Th1 cells, treated with a pool of 8 SI-RNAs specific for *Foxo1* and *Foxo3* or a SI-SCR control, analyzed 48h after SI-RNA treatment by qRT-PCR, presented relative to the SI-SCR control. Data is shown as mean +SEM, n = 3 pooled from one experiments. (B) Mature miR-31 expression normalized to snU6 in activated CD4<sup>+</sup> cells transduced 36-40h post activation with a retroviral vector expressing a constitutive active FOXO1 (FOXO1A3) or an empty control vector (RV). Cells were cultured under Th1 polarizing conditions for additional 48h. Expression was analyzed by qRT-PCR 48h post transduction and is presented relative to RV. Data is shown as mean +SEM, n = 3 pooled from one experiment. (C) *Pri-miR-31* expression normalized to *Hprt* in Th1 rep cells activated with  $\alpha$ CD3/28 under Th1 polarizing conditions for 48h  $\pm$  TGF $\beta$ , presented relative to values obtained from untreated Th1 rep cells determined by qRT-PCR. Data is shown as mean +SEM, n = 6-9 pooled from three independent experiments.
