# Supplementary material for: MicroRNA-31 Reduces the Motility of Proinflammatory T Helper 1 Lymphocytes
Source: Front Immunol. 2018 Dec 6;9:2813. doi: 10.3389/fimmu.2018.02813 (PMC6291424; doi:10.3389/fimmu.2018.02813)
Supplement: Supplementary file 1 [file Table_1.xlsx]

## Sheet: Supp Table 1
Supplementary Table 1:
Putative miR-31 targets, based on phylogenetic conservation
of miR-31 bs and on experimentally validated targets.
Gene Symbol:	Source:
0610009O20RIK	TargetScanMouse7.1
1700019N19RIK	TargetScanMouse7.1
3110001I22RIK	TargetScanMouse7.1
4930578C19RIK	TargetScanMouse7.1
4931406P16RIK	TargetScanMouse7.1
4932411E22RIK	TargetScanMouse7.1
4933406J08RIK	TargetScanMouse7.1
ABCB9	PMID: 24099915
ABLIM1	TargetScanMouse7.1
ACTG1	TargetScanMouse7.1
ACVR1	TargetScanMouse7.1
ADAM10	TargetScanMouse7.1
ADCY6	TargetScanMouse7.1
AF529169	TargetScanMouse7.1
AGAP1	TargetScanMouse7.1
AGO3	TargetScanMouse7.1
AHCYL1	TargetScanMouse7.1
AHSA2	TargetScanMouse7.1
AHSG	TargetScanMouse7.1
AI593442	TargetScanMouse7.1
AK4	TargetScanMouse7.1
AKAP1	TargetScanMouse7.1
AKAP17B	TargetScanMouse7.1
AKAP7	TargetScanMouse7.1
AMMECR1	TargetScanMouse7.1
ANKRD52	TargetScanMouse7.1
APBB2	TargetScanMouse7.1
ARFGAP2	TargetScanMouse7.1
ARHGAP32	TargetScanMouse7.1
ARHGEF26	TargetScanMouse7.1
ARID1A	TargetScanMouse7.1
ARRDC3	TargetScanMouse7.1
ASTN2	TargetScanMouse7.1
ATL2	TargetScanMouse7.1
ATP10B	TargetScanMouse7.1
ATP8A1	TargetScanMouse7.1
ATXN3	TargetScanMouse7.1
AXIN1	TargetScanMouse7.1
B3GNT2	TargetScanMouse7.1
BACH2	TargetScanMouse7.1
BAHD1	TargetScanMouse7.1
BAP1	TargetScanMouse7.1
BC106179	TargetScanMouse7.1
BCL6	TargetScanMouse7.1
BEND4	TargetScanMouse7.1
BICD1	TargetScanMouse7.1
C030046E11RIK	TargetScanMouse7.1
C530008M17RIK	TargetScanMouse7.1
CACNB2	TargetScanMouse7.1
CALCR	TargetScanMouse7.1
CAMK2D	TargetScanMouse7.1
CAPN5	TargetScanMouse7.1
CCDC116	TargetScanMouse7.1
CCNJ	TargetScanMouse7.1
CCNT1	TargetScanMouse7.1
CD28	TargetScanMouse7.1
CD72	TargetScanMouse7.1
CDIP1	TargetScanMouse7.1
CDK1	TargetScanMouse7.1
CDK2	PMID: 25797269
CEP85	TargetScanMouse7.1
CGN	TargetScanMouse7.1
CHD6	TargetScanMouse7.1
CHD7	TargetScanMouse7.1
CHMP7	TargetScanMouse7.1
CHTF8	TargetScanMouse7.1
CLASP2	TargetScanMouse7.1
CLCF1	TargetScanMouse7.1
CLCN3	TargetScanMouse7.1
CLDN4	TargetScanMouse7.1
CLOCK	TargetScanMouse7.1
CNIH4	TargetScanMouse7.1
CNP	TargetScanMouse7.1
CNTNAP4	TargetScanMouse7.1
COL5A1	TargetScanMouse7.1
COPS2	TargetScanMouse7.1
CORO7	TargetScanMouse7.1
CPLX2	TargetScanMouse7.1
CPSF2	TargetScanMouse7.1
CSMD1	TargetScanMouse7.1
CSNK1D	TargetScanMouse7.1
CSRNP3	TargetScanMouse7.1
CTNND2	TargetScanMouse7.1
CUL5	TargetScanMouse7.1
CXCL12	TargetScanMouse7.1
CYB5B	TargetScanMouse7.1
D430041D05RIK	TargetScanMouse7.1
DAGLB	TargetScanMouse7.1
DCAF6	TargetScanMouse7.1
DDI2	TargetScanMouse7.1
DDX6	TargetScanMouse7.1
DENND6A	TargetScanMouse7.1
DHCR24	TargetScanMouse7.1
DHRS9	TargetScanMouse7.1
DICER1	TargetScanMouse7.1
DLGAP2	TargetScanMouse7.1
DLX4	TargetScanMouse7.1
DMD	TargetScanMouse7.1
DOCK1	TargetScanMouse7.1
DPEP3	TargetScanMouse7.1
DPY19L3	TargetScanMouse7.1
DPYSL3	TargetScanMouse7.1
DPYSL5	TargetScanMouse7.1
DUSP1	TargetScanMouse7.1
DUSP7	TargetScanMouse7.1
E2F2	TargetScanMouse7.1
EBF3	TargetScanMouse7.1
EGLN1	TargetScanMouse7.1
EGLN3	TargetScanMouse7.1
EHD1	TargetScanMouse7.1
EIF4EBP2	TargetScanMouse7.1
EIF5	TargetScanMouse7.1
ELAVL1	TargetScanMouse7.1
ELAVL2	TargetScanMouse7.1
EML5	TargetScanMouse7.1
ENY2	TargetScanMouse7.1
EPHA5	TargetScanMouse7.1
EPHB3	TargetScanMouse7.1
FAM120C	TargetScanMouse7.1
FAM122A	TargetScanMouse7.1
FAM134B	TargetScanMouse7.1
FAM196A	TargetScanMouse7.1
FAM65A	TargetScanMouse7.1
FEM1C	TargetScanMouse7.1
FGD6	TargetScanMouse7.1
FGF16	TargetScanMouse7.1
FGF6	TargetScanMouse7.1
FIGN	TargetScanMouse7.1
FLOT1	TargetScanMouse7.1
FMOD	TargetScanMouse7.1
FNDC5	TargetScanMouse7.1
FOXP3	TargetScanMouse7.1
FPGT	TargetScanMouse7.1
FUBP1	TargetScanMouse7.1
FXR1	TargetScanMouse7.1
FZD3	TargetScanMouse7.1
G3BP2	TargetScanMouse7.1
GAD2	TargetScanMouse7.1
GATAD2B	TargetScanMouse7.1
GIGYF1	TargetScanMouse7.1
GLCCI1	TargetScanMouse7.1
GLO1	TargetScanMouse7.1
GLRA2	TargetScanMouse7.1
GLTSCR1	TargetScanMouse7.1
GLUL	TargetScanMouse7.1
GM15737	TargetScanMouse7.1
GM28048	TargetScanMouse7.1
GM6970	TargetScanMouse7.1
GPR137	TargetScanMouse7.1
GPR179	TargetScanMouse7.1
GPRIN3	TargetScanMouse7.1
GRB10	TargetScanMouse7.1
GRIK3	TargetScanMouse7.1
GSPT1	TargetScanMouse7.1
GXYLT1	TargetScanMouse7.1
HEATR5A	TargetScanMouse7.1
HIAT1	TargetScanMouse7.1
HIF1AN	TargetScanMouse7.1
HOMER1	TargetScanMouse7.1
HOXA3	TargetScanMouse7.1
HSF2BP	TargetScanMouse7.1
HSPH1	TargetScanMouse7.1
HTT	TargetScanMouse7.1
IFI30	TargetScanMouse7.1
IKZF1	TargetScanMouse7.1
IL34	TargetScanMouse7.1
IQSEC2	TargetScanMouse7.1
IRF1	PMID: 24940638
ISL1	TargetScanMouse7.1
ITGA5	TargetScanMouse7.1
ITGB3	PMID: 21875932
ITPR2	TargetScanMouse7.1
JARID2	TargetScanMouse7.1
JAZF1	TargetScanMouse7.1
JMJD8	TargetScanMouse7.1
KANK1	TargetScanMouse7.1
KCNN3	TargetScanMouse7.1
KCNV2	TargetScanMouse7.1
KCTD21	TargetScanMouse7.1
KDM2B	TargetScanMouse7.1
KHDRBS3	TargetScanMouse7.1
KIF2A	TargetScanMouse7.1
KLF13	TargetScanMouse7.1
KLF3	TargetScanMouse7.1
KREMEN1	TargetScanMouse7.1
KRT84	TargetScanMouse7.1
LATS2	TargetScanMouse7.1
LBH	TargetScanMouse7.1
LCLAT1	TargetScanMouse7.1
LENG8	TargetScanMouse7.1
LGALSL	TargetScanMouse7.1
LMAN2	TargetScanMouse7.1
LPP	TargetScanMouse7.1
LSAMP	TargetScanMouse7.1
LYZL6	TargetScanMouse7.1
LZIC	TargetScanMouse7.1
MAFG	TargetScanMouse7.1
MAP1B	TargetScanMouse7.1
MAP3K1	TargetScanMouse7.1
MAP4K5	TargetScanMouse7.1
MAPKAPK2	TargetScanMouse7.1
MAPRE1	TargetScanMouse7.1
MBNL3	TargetScanMouse7.1
MBOAT2	TargetScanMouse7.1
MLEC	TargetScanMouse7.1
MLH1	PMID: 23539435
MLXIP	TargetScanMouse7.1
MMP16	TargetScanMouse7.1
MOSPD2	TargetScanMouse7.1
MPHOSPH9	TargetScanMouse7.1
MRPL48	TargetScanMouse7.1
MTIF3	TargetScanMouse7.1
MUC19	TargetScanMouse7.1
MYF5	TargetScanMouse7.1
NAA15	TargetScanMouse7.1
NAA50	TargetScanMouse7.1
NCOA2	TargetScanMouse7.1
NDRG3	TargetScanMouse7.1
NEDD4L	TargetScanMouse7.1
NEK9	TargetScanMouse7.1
NFATC4	TargetScanMouse7.1
NGF	TargetScanMouse7.1
NKAIN3	TargetScanMouse7.1
NLGN1	TargetScanMouse7.1
NR5A2	TargetScanMouse7.1
NSUN4	TargetScanMouse7.1
NUFIP2	TargetScanMouse7.1
NUMB	TargetScanMouse7.1
NUP153	TargetScanMouse7.1
NXPH1	TargetScanMouse7.1
OGFRL1	TargetScanMouse7.1
OSBP2	TargetScanMouse7.1
OTUD6B	TargetScanMouse7.1
OVCA2	TargetScanMouse7.1
OXSR1	TargetScanMouse7.1
PAFAH1B2	TargetScanMouse7.1
PAQR8	TargetScanMouse7.1
PARPBP	TargetScanMouse7.1
PCDH8	TargetScanMouse7.1
PCDHA10	TargetScanMouse7.1
PCX	TargetScanMouse7.1
PDCD6IP	TargetScanMouse7.1
PDE11A	TargetScanMouse7.1
PDIA3	TargetScanMouse7.1
PDPR	TargetScanMouse7.1
PDZD4	TargetScanMouse7.1
PEX5	TargetScanMouse7.1
PHACTR2	TargetScanMouse7.1
PIGV	TargetScanMouse7.1
PIK3C2A	TargetScanMouse7.1
PLCD4	TargetScanMouse7.1
PLCE1	TargetScanMouse7.1
PLEKHA1	TargetScanMouse7.1
PLXDC2	TargetScanMouse7.1
PLXNA2	TargetScanMouse7.1
PLXNA4	TargetScanMouse7.1
POU2F1	TargetScanMouse7.1
POU2F3	TargetScanMouse7.1
PPM1F	TargetScanMouse7.1
PPP1R7	TargetScanMouse7.1
PPP1R9A	TargetScanMouse7.1
PPP2R2A	TargetScanMouse7.1
PPP2R5C	TargetScanMouse7.1
PPP3CA	TargetScanMouse7.1
PPP6C	TargetScanMouse7.1
PPP6R3	TargetScanMouse7.1
PREPL	TargetScanMouse7.1
PRKCE	TargetScanMouse7.1
PRPF40A	TargetScanMouse7.1
PTPN14	TargetScanMouse7.1
PTPRF	TargetScanMouse7.1
PVRL3	TargetScanMouse7.1
RAB14	TargetScanMouse7.1
RAB19	TargetScanMouse7.1
RAB29	TargetScanMouse7.1
RAB6B	TargetScanMouse7.1
RAB9B	TargetScanMouse7.1
RALGPS1	TargetScanMouse7.1
RAP1B	TargetScanMouse7.1
RAPGEF5	TargetScanMouse7.1
RAPH1	TargetScanMouse7.1
RASA1	TargetScanMouse7.1
RBBP4	TargetScanMouse7.1
RBMS1	TargetScanMouse7.1
RCOR1	TargetScanMouse7.1
RCOR2	TargetScanMouse7.1
RDX	TargetScanMouse7.1
RET	TargetScanMouse7.1
RGAG1	TargetScanMouse7.1
RGS4	TargetScanMouse7.1
RHBDL3	TargetScanMouse7.1
RHOBTB1	TargetScanMouse7.1
RIMS3	TargetScanMouse7.1
RNF114	TargetScanMouse7.1
RNF144B	TargetScanMouse7.1
RNF150	TargetScanMouse7.1
RNF183	TargetScanMouse7.1
RREB1	TargetScanMouse7.1
RSBN1	TargetScanMouse7.1
RSC1A1	TargetScanMouse7.1
RSF1	TargetScanMouse7.1
SATB2	TargetScanMouse7.1
SCG3	TargetScanMouse7.1
SCN4B	TargetScanMouse7.1
SEC14L3	TargetScanMouse7.1
SELT	TargetScanMouse7.1
SEMA6D	TargetScanMouse7.1
SEPHS1	TargetScanMouse7.1
SEPT3	TargetScanMouse7.1
SERF2	TargetScanMouse7.1
SERTAD2	TargetScanMouse7.1
SFXN1	TargetScanMouse7.1
SGMS1	TargetScanMouse7.1
SH3BGRL2	TargetScanMouse7.1
SH3BP1	TargetScanMouse7.1
SHISA6	TargetScanMouse7.1
SIM1	TargetScanMouse7.1
SLBP	TargetScanMouse7.1
SLC17A8	TargetScanMouse7.1
SLC1A2	TargetScanMouse7.1
SLC24A3	TargetScanMouse7.1
SLC25A35	TargetScanMouse7.1
SLC2A4	TargetScanMouse7.1
SLC39A14	TargetScanMouse7.1
SLC39A9	TargetScanMouse7.1
SLC43A2	TargetScanMouse7.1
SLC45A4	TargetScanMouse7.1
SLC6A6	TargetScanMouse7.1
SLIRP	TargetScanMouse7.1
SMIM13	TargetScanMouse7.1
SNX22	TargetScanMouse7.1
SNX4	TargetScanMouse7.1
SP7	PMID: 23827457
SPATA2	TargetScanMouse7.1
SPC25	TargetScanMouse7.1
SPIDR	TargetScanMouse7.1
SRCAP	TargetScanMouse7.1
SRP54A	TargetScanMouse7.1
SRP54B	TargetScanMouse7.1
SS18	TargetScanMouse7.1
SSBP3	TargetScanMouse7.1
STAU2	TargetScanMouse7.1
STK40	TargetScanMouse7.1
STRADA	TargetScanMouse7.1
STRIP2	TargetScanMouse7.1
STX12	TargetScanMouse7.1
SUCO	TargetScanMouse7.1
SUPT16	TargetScanMouse7.1
SWT1	TargetScanMouse7.1
SYDE1	TargetScanMouse7.1
SYDE2	TargetScanMouse7.1
SYN2	TargetScanMouse7.1
SYT6	TargetScanMouse7.1
TACC1	TargetScanMouse7.1
TACC2	TargetScanMouse7.1
TAF4A	TargetScanMouse7.1
TARDBP	TargetScanMouse7.1
TBC1D22A	TargetScanMouse7.1
TCEB1	TargetScanMouse7.1
TECPR2	TargetScanMouse7.1
TENM4	TargetScanMouse7.1
TESK2	TargetScanMouse7.1
TEX261	TargetScanMouse7.1
TFRC	TargetScanMouse7.1
THTPA	TargetScanMouse7.1
TIMP3	TargetScanMouse7.1
TM9SF3	TargetScanMouse7.1
TMED1	TargetScanMouse7.1
TMED10	TargetScanMouse7.1
TMEM145	TargetScanMouse7.1
TMEM168	TargetScanMouse7.1
TMEM43	TargetScanMouse7.1
TMEM74	TargetScanMouse7.1
TMOD2	TargetScanMouse7.1
TMPRSS11F	TargetScanMouse7.1
TNIK	TargetScanMouse7.1
TNS1	TargetScanMouse7.1
TOMM6	TargetScanMouse7.1
TRAF4	TargetScanMouse7.1
TRANK1	TargetScanMouse7.1
TSPAN31	TargetScanMouse7.1
TTBK1	TargetScanMouse7.1
UBALD1	TargetScanMouse7.1
UBE2K	TargetScanMouse7.1
UBN1	TargetScanMouse7.1
UBN2	TargetScanMouse7.1
UCN2	TargetScanMouse7.1
ULK3	TargetScanMouse7.1
USP28	TargetScanMouse7.1
USP49	TargetScanMouse7.1
VAMP4	TargetScanMouse7.1
VAPB	TargetScanMouse7.1
VAT1L	TargetScanMouse7.1
VAV3	PMID: 26663584
VPS26B	TargetScanMouse7.1
VPS39	TargetScanMouse7.1
VTI1A	TargetScanMouse7.1
WASF3	PMID: 21105030
WDR20	TargetScanMouse7.1
WDR5	TargetScanMouse7.1
WDR77	TargetScanMouse7.1
WNK1	TargetScanMouse7.1
WNT2	TargetScanMouse7.1
XPNPEP3	TargetScanMouse7.1
XYLT1	TargetScanMouse7.1
YLPM1	TargetScanMouse7.1
YPEL2	TargetScanMouse7.1
YWHAE	TargetScanMouse7.1
ZBTB20	TargetScanMouse7.1
ZBTB21	TargetScanMouse7.1
ZBTB34	TargetScanMouse7.1
ZC3H12C	TargetScanMouse7.1
ZDHHC18	TargetScanMouse7.1
ZDHHC20	TargetScanMouse7.1
ZFHX4	TargetScanMouse7.1
ZFP280C	TargetScanMouse7.1
ZFP36L1	TargetScanMouse7.1
ZFP574	TargetScanMouse7.1
ZFP704	TargetScanMouse7.1
ZSCAN18	TargetScanMouse7.1
ZSWIM6	TargetScanMouse7.1
